# Supplementary material for: VS2: an efficient catalyst for an electrochemical hydrogen evolution reaction in an acidic medium
Source: Royal Society of Chemistry journal article supplement (doi:10.1039/c8dt02547a), 2018-01-01
Supplement: c8dt02547a1.pdf [file c8dt02547a1.pdf]

## Supporting Information

### **VS<sub>2</sub>: An efficient Catalyst for Electrochemical Hydrogen Evolution Reaction in Acid Medium**

Jiban K. Das<sup>a,b</sup>, Aneeya K. Samantara<sup>a,b</sup>, Arpan K. Nayak<sup>c</sup>, Debabrata Pradhan<sup>c</sup> and J. N. Behera<sup>a,b,\*</sup>

---

<sup>a</sup> *School of Chemical Sciences, National Institute of Science Education and Research (NISER), P.O. Jatni, Khurda 752050, Odisha, India.*

<sup>b</sup> *HomiBhabha National Institute, Mumbai, India*

<sup>c</sup> *Materials Science Centre, Indian Institute of Technology, Kharagpur 721302, West Bengal, India.*

e-mail: jnbehera@niser.ac.in

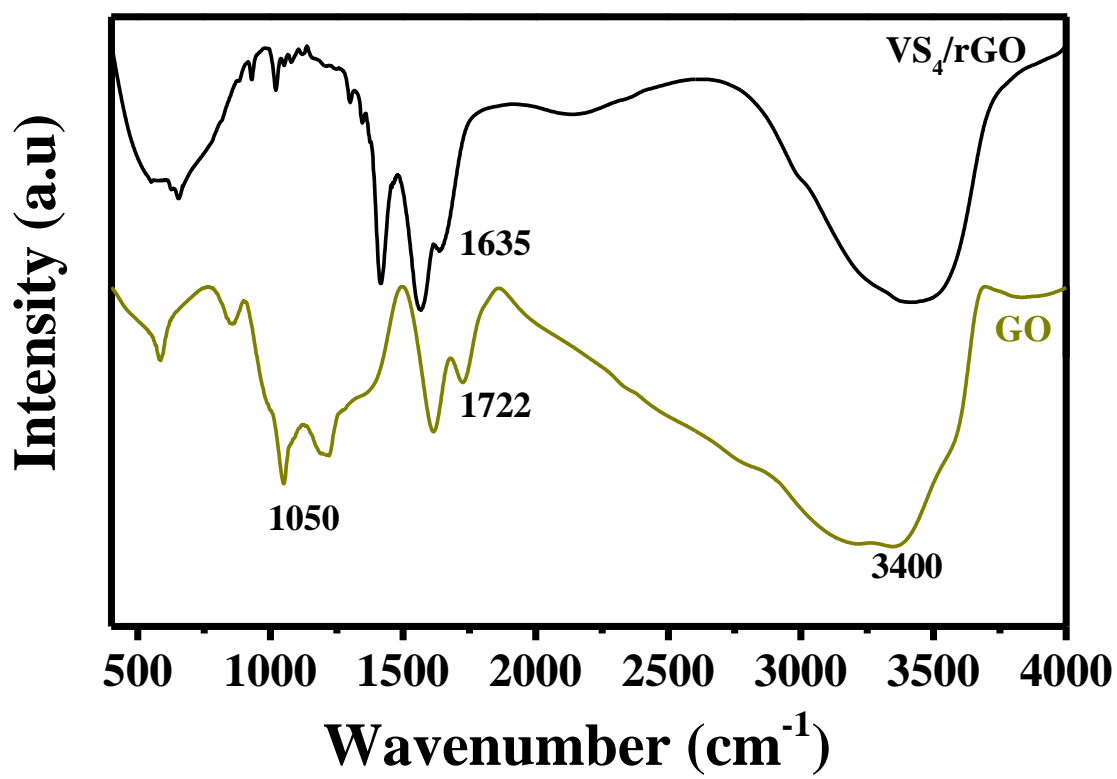

**Figure S1** Fourier transform infrared spectrum for graphene oxide and  $\text{VS}_4/\text{rGO}$  composite

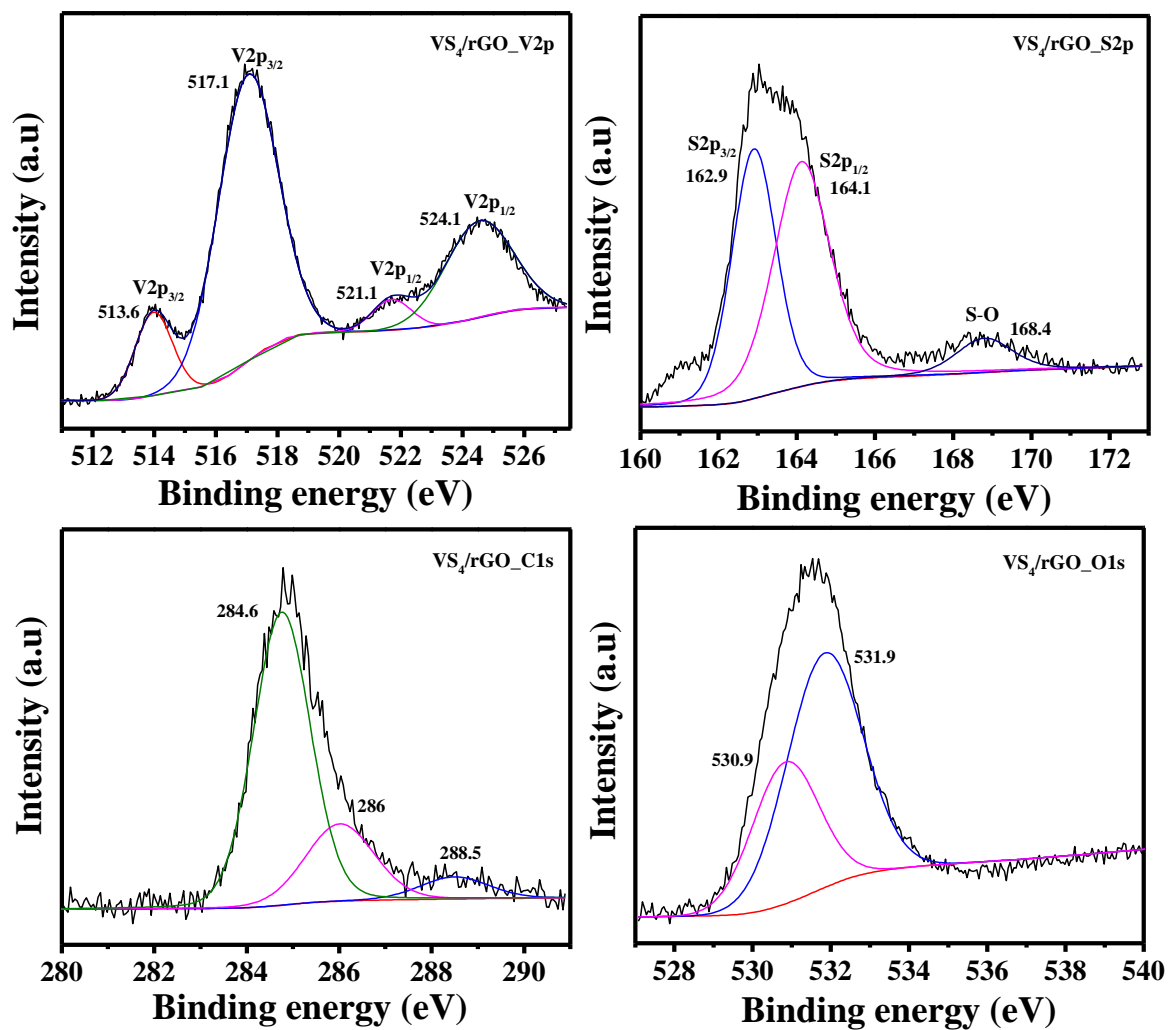

**Figure S2** High resolution XPS of V2p, S2p, O1s and C1s of VS<sub>4</sub>/rGO composite.

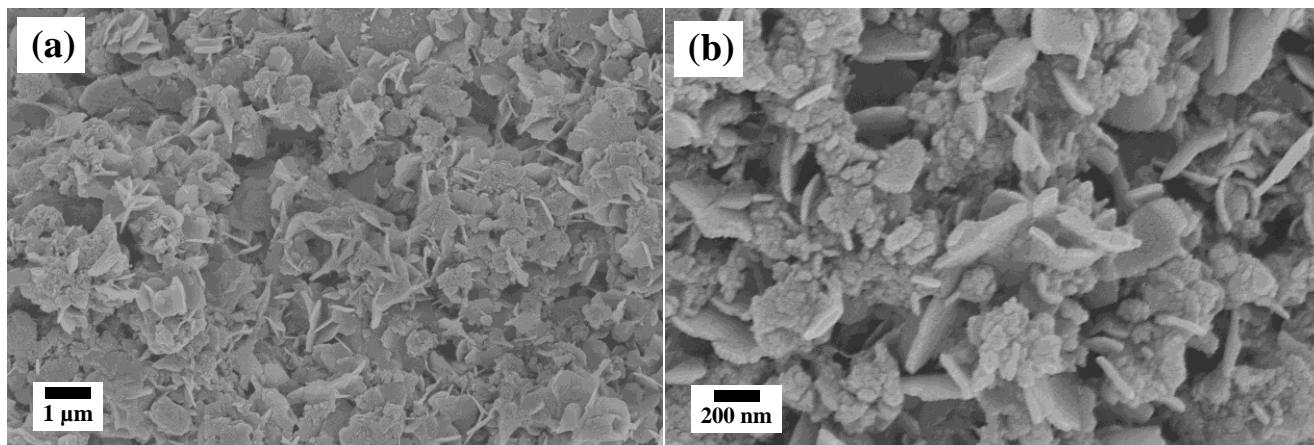

**Figure S3** Field emission scanning electron microscopic images for VS<sub>4</sub>/rGO at low (a) and higher (b) magnifications.

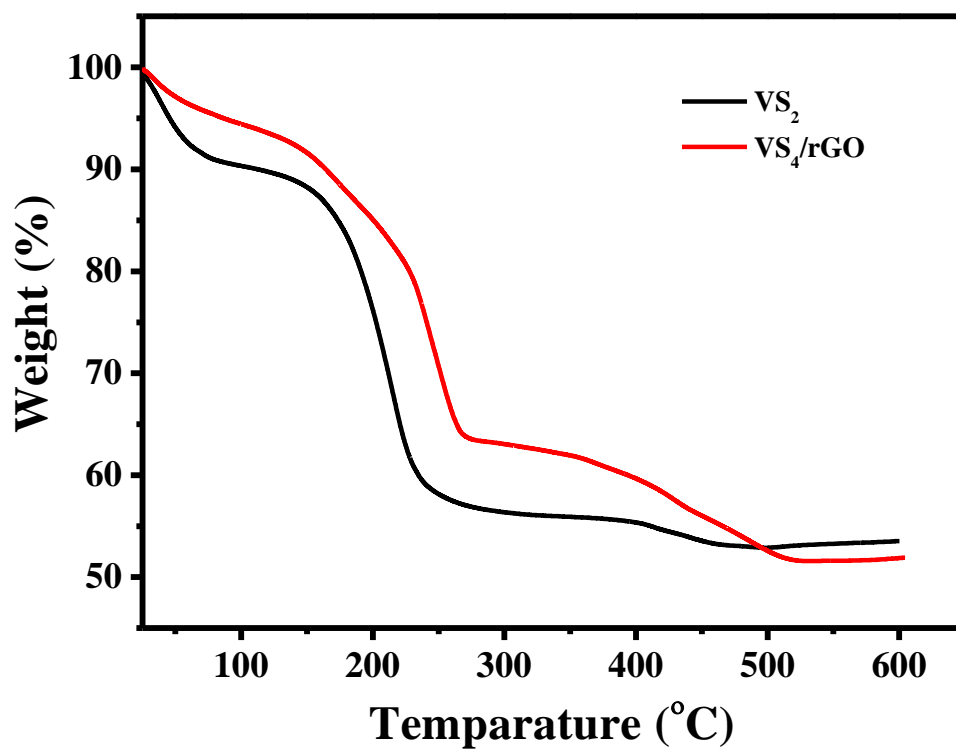

**Figure S4** Thermo gravimetric analysis for VS<sub>2</sub> and VS<sub>4</sub>/rGO

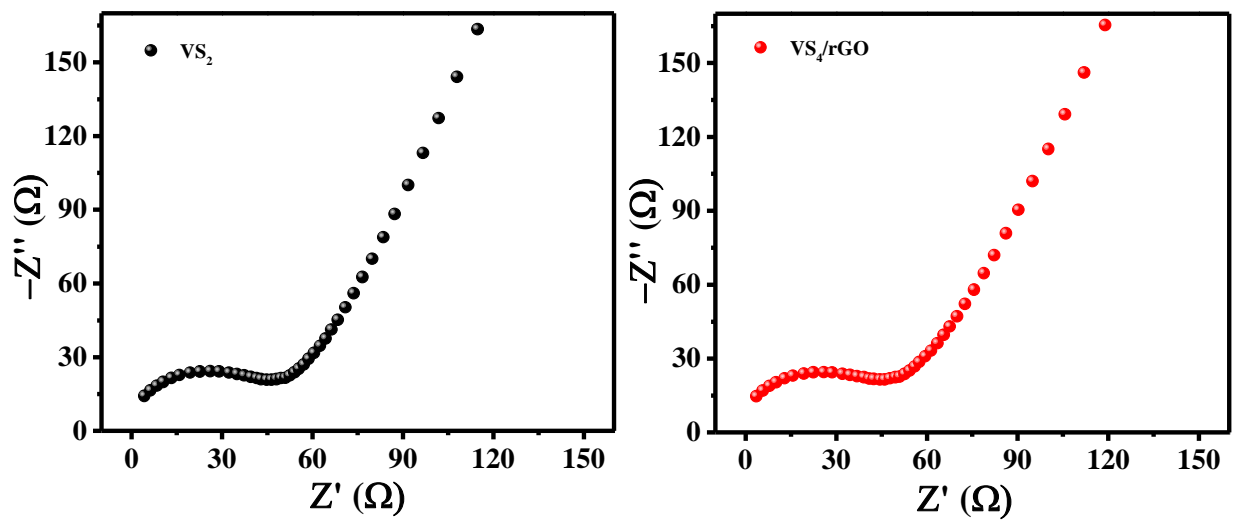

**Figure S5** Nyquist impedance spectrum for the  $\text{VS}_2$  and  $\text{VS}_4/\text{rGO}$  composites.

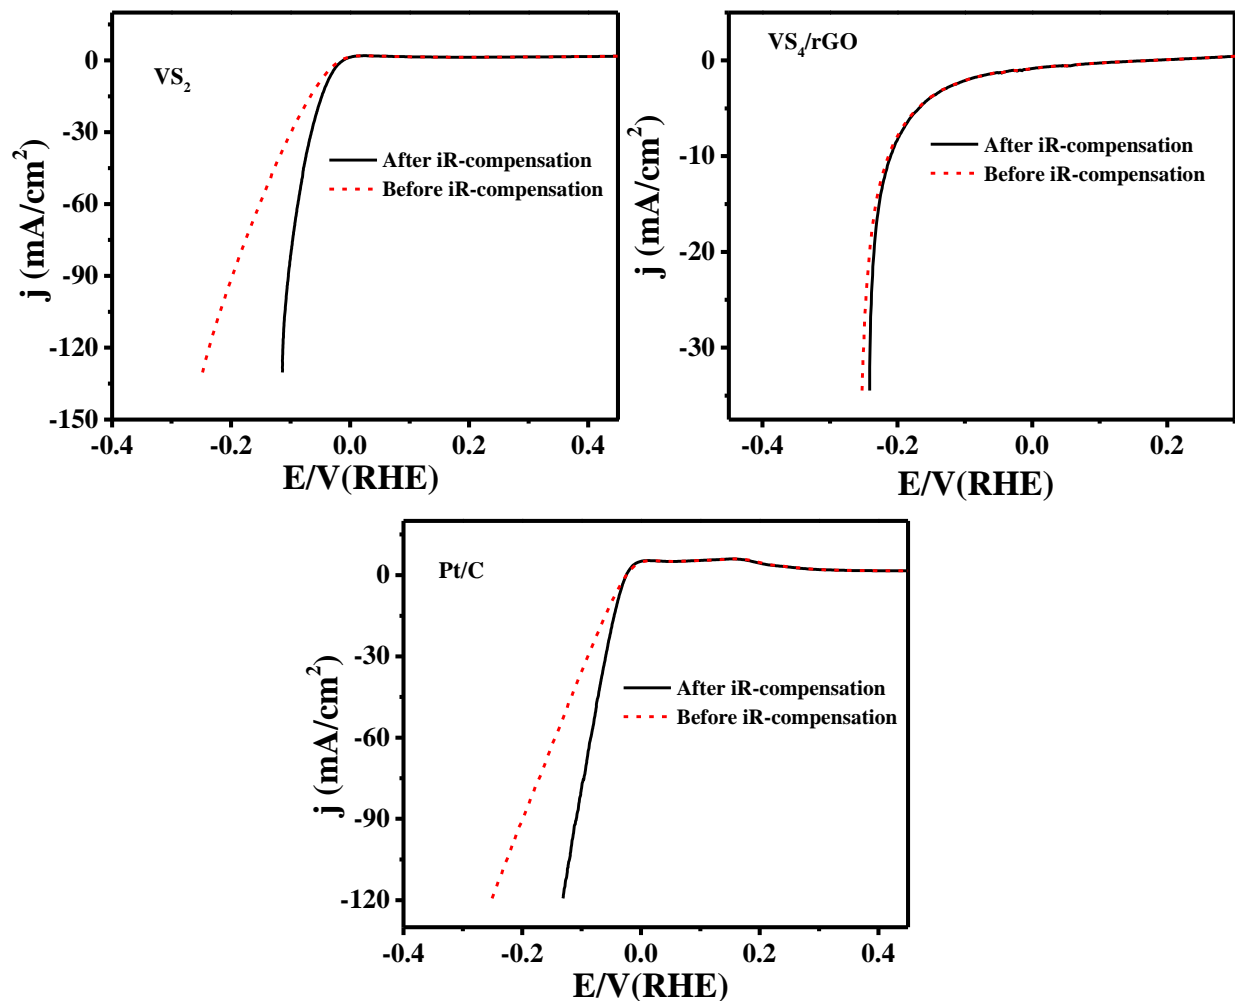

**Figure S6** Linear sweep voltamograms for  $\text{VS}_2$ ,  $\text{VS}_4/\text{rGO}$  and Pt/C before and after iR compensation in 0.1M  $\text{H}_2\text{SO}_4$  electrolyte. The LSVs are recorded at a sweep rate of 5 mV/s.

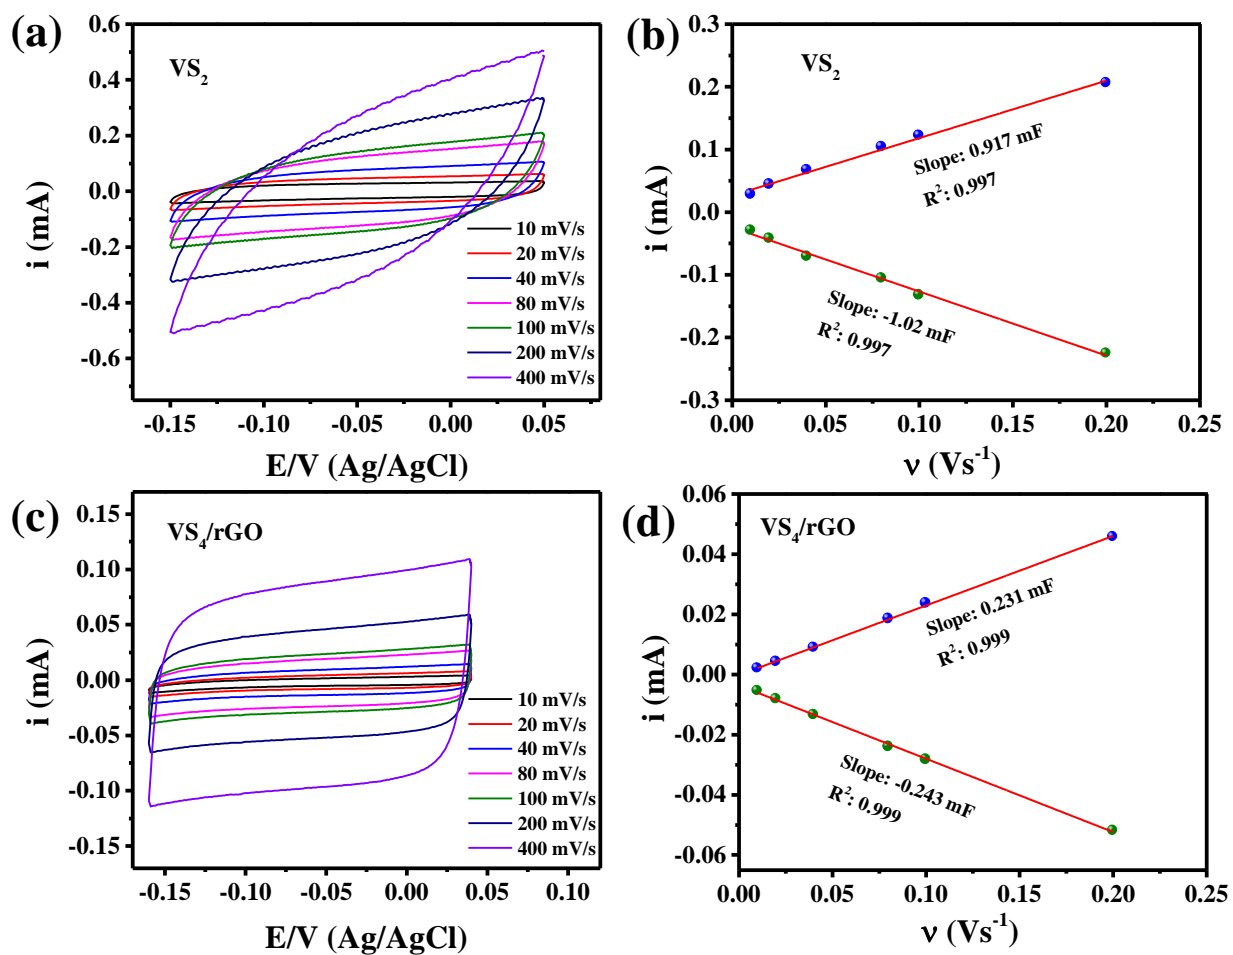

**Figure S7** (a, c) are the cyclic voltammograms in 0.1M H<sub>2</sub>SO<sub>4</sub> at different scan rates (10 to 400 mV/s) and (b, d) are the plot of scan rate vs. cathodic and anodic current at -0.05 V for VS<sub>2</sub> and VS<sub>4</sub>/rGO.

**Table S1.** A brief literature survey on metal sulphide catalysts for HER

| Sl. No. | Sample                                            | Electrolyte H <sub>2</sub> SO <sub>4</sub> (M) | Over potential 10mA/cm <sup>2</sup> (mV) | Tafel slope (mV/dec) | Reference                                                |
|---------|---------------------------------------------------|------------------------------------------------|------------------------------------------|----------------------|----------------------------------------------------------|
| 1       | 1T MoS <sub>2</sub>                               | 0.5                                            | 100                                      | 40                   | Nano Lett. 2013, 13, 6222                                |
| 2       | 1T-VS <sub>2</sub>                                | 0.5                                            | 68                                       | 34                   | Adv. Mater. 2015, 27, 5605                               |
| 3       | CoS <sub>2</sub> /rGO                             | 0.5                                            | 150                                      | 48                   | Nano Convergence, 2016, 3:5.                             |
| 4       | NiS <sub>2</sub> /rGO                             | 0.5                                            | 200                                      | 52                   | Catalysis Communications, 2016, 85, 26                   |
| 5       | 2H-MoS <sub>2</sub> triangle, Mo edge             | 0.5                                            | 201                                      | 68                   | Adv. Mater. 2017, 1701955                                |
| 6       | 2H-MoS <sub>2</sub> basal plane                   | 0.5                                            | 425                                      | 109                  | Adv. Mater. 2017, 1701955                                |
| 7       | 1T'-MoS <sub>2</sub> basal plane                  | 0.5                                            | 356                                      | 84                   | Adv. Mater. 2017, 1701955                                |
| 8       | H-Co/MoS <sub>2</sub>                             | 0.5                                            | 156                                      | 58                   | Nano Energy, 2017, 39, 409                               |
| 9       | WS <sub>2</sub>                                   | 0.5                                            | 337                                      | 80                   | Nanoscale, 2017, 9, 13515                                |
| 10      | Fe-MoS <sub>2</sub>                               | 0.5                                            | 136                                      | 82                   | Electrochimica Acta, 2017, 20, 72                        |
| 11      | 3D WS <sub>2</sub> /graphene /Ni                  | 0.5                                            | 87                                       | 79                   | Int. journal of hydrogen energy, 2017, 7811.             |
| 12      | rGO/WS <sub>2</sub>                               | 0.5                                            | 229                                      | 73                   | Nanoscale, 2015, 7, 14760                                |
| 13      | Annealed WS <sub>2</sub> /CC                      | 0.5                                            | 250 mv at 15 mA/cm <sup>2</sup>          | 50                   | J. Mater. Chem. A, 2015, 3, 131                          |
| 14      | Freeze-dried WS <sub>2</sub> /rGO after annealing | 0.5                                            | 300 mv at 23 mA/cm <sup>2</sup>          | 58                   | Angew. Chem. Int. Ed., 2013, 52, 13751                   |
| 15      | 3D WS <sub>2</sub> /Ni                            | 0.5                                            | 115                                      | 98                   | International journal of hydrogen energy, 2017, 42, 7811 |
| 16      | WS <sub>2</sub> /3DG sheet                        | 0.5                                            | 137 mv at 300 mA/cm <sup>2</sup>         | 131                  | J. Mater. Chem. A, 2015, 3, 24128                        |
| 17      | MoS <sub>2</sub>                                  | 0.5                                            | 214                                      | 74                   | ACS Appl. Mater. Interfaces, 2016, 8, 5517               |
| 18      | WC-CNTs                                           | 0.5                                            | 145                                      | 72                   | ACS Nano, 2015, 9, 5125                                  |
| 19      | VS <sub>2</sub> Nano flower                       | 0.5                                            | 58                                       | 34                   | J. Mater. Chem. A, 2017, 5, 15080                        |
| 20      | VS <sub>2</sub> Nano plate                        | 0.5                                            | 42                                       | 36                   | Chem. Mater. 2016, 28, 5587                              |
| 21      | VS <sub>2</sub>                                   | 0.1                                            | 41                                       | 36                   | <b>This Work</b>                                         |
| 22      | VS <sub>4</sub> /rGO                              | 0.1                                            | 210                                      | 73                   | <b>This Work</b>                                         |



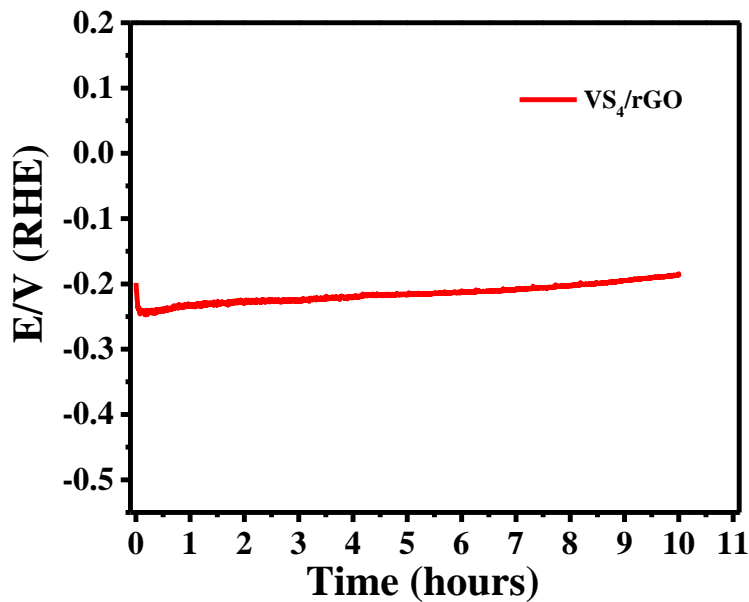

**Figure S8** The long term stability test for HER by the VS<sub>4</sub>/rGO modified GCE in 0.1 M H<sub>2</sub>SO<sub>4</sub> electrolyte. Here the stability test was carried out by using the Chrono potentiometric technique at a state of art current density of 10 mA/cm<sup>2</sup>.

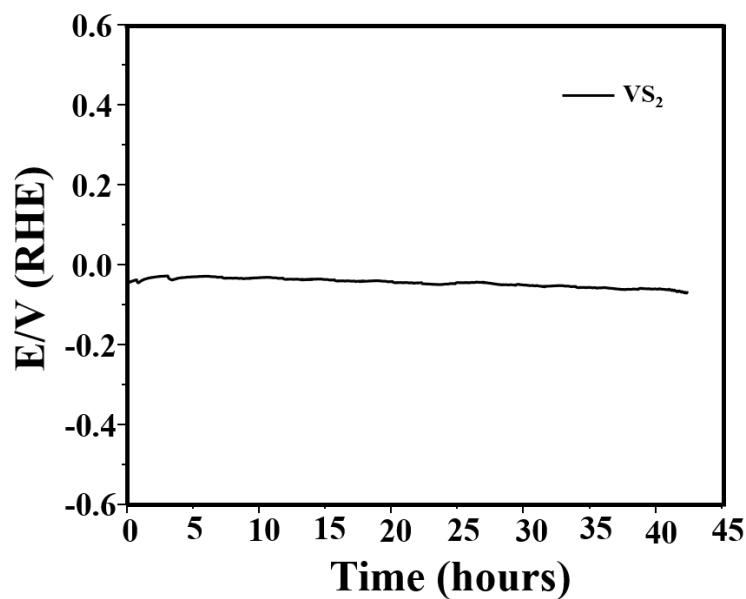

**Figure S9** The long term stability test for HER by the VS<sub>2</sub> modified GCE in 0.1 M H<sub>2</sub>SO<sub>4</sub> electrolyte at a current density of 30 mA/cm<sup>2</sup>.

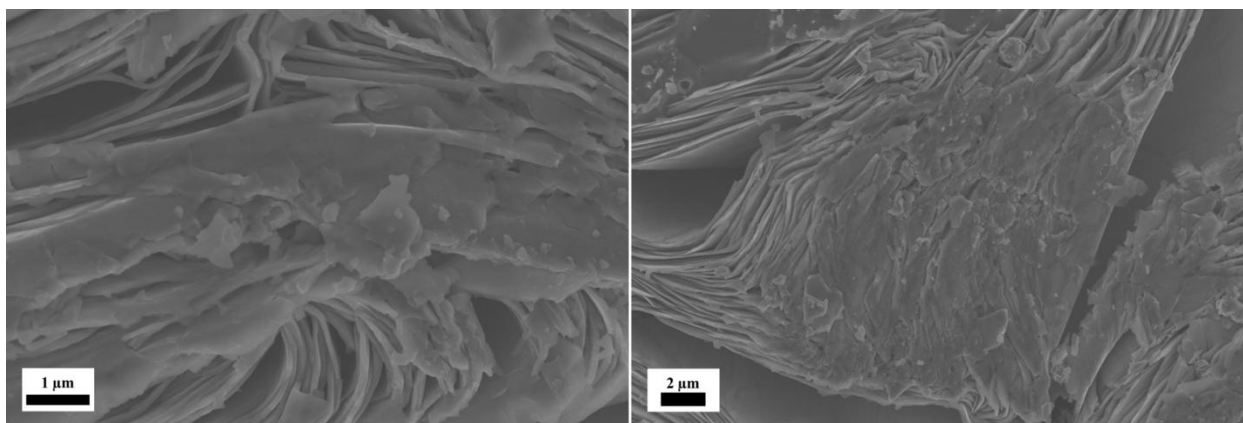

**Figure S10** FESEM images for the VS<sub>2</sub> after the Chronopotentiometric measurement at 10 mA/cm<sup>2</sup>.

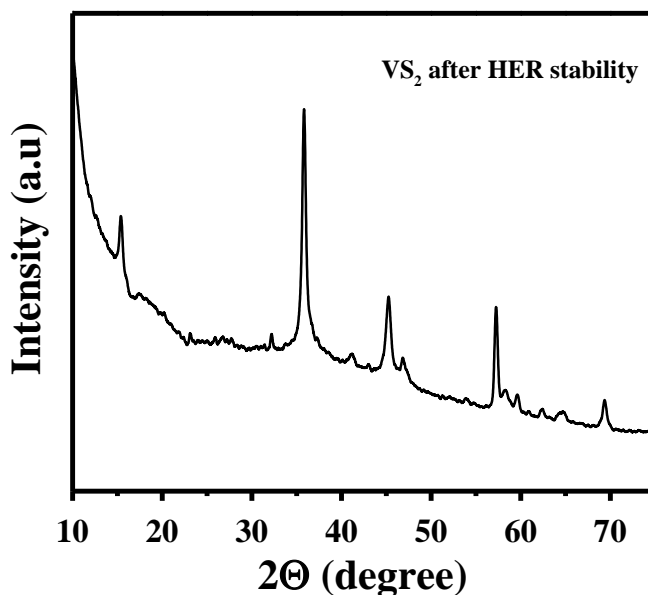

**Figure S11** XRD for the VS<sub>2</sub> after the Chronopotentiometric measurement at current density of 10 mA/cm<sup>2</sup>.

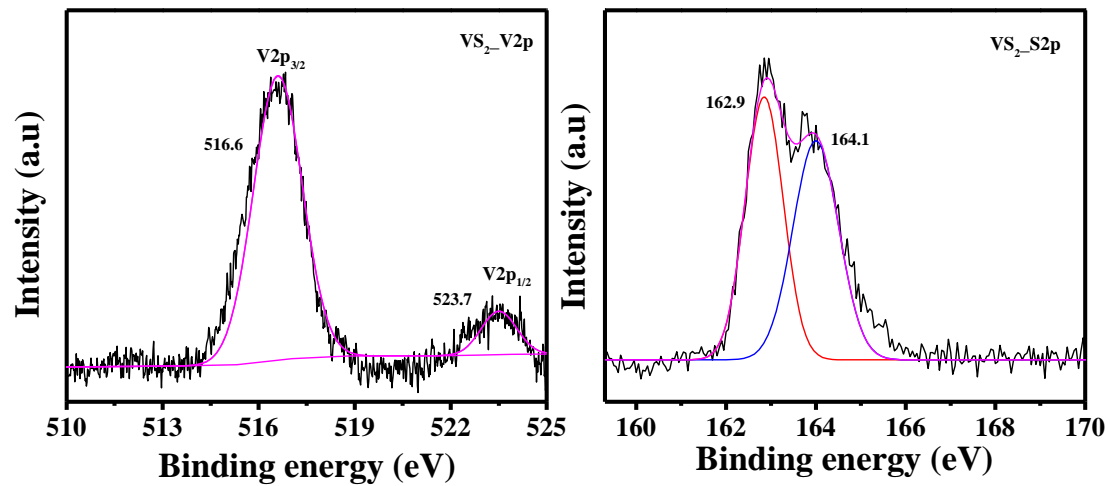

**Figure S12** High resolution XPS spectrum for V2p and S2p of VS<sub>2</sub> after the long Chronopotentiometric measurement at 10 mA/cm<sup>2</sup>.
